# Supplementary material
Source: PubMed Central journal article supplement (PMC3391323)
Supplement: NIHMS327929-supplement-1.pdf [file NIHMS327929-supplement-1.pdf]

## SUPPLEMENTAL DATA I. Tryptic Peptides Mass Spectrometric Identification Data

(Numbers refer to the designation in Table 1 and Figure 3 of the main text; all the spots from identical gene products were listed sequentially)

### HSP #1

[gi|149063018](#) Mass: 22794 Score: 647 Queries matched: 8

heat shock 27kDa protein 1 [Rattus norvegicus]

| Query | Observed  | Mr(expt)  | Mr(calc)  | ppm  | Miss | Score | Expect  | Rank | Peptide               |
|-------|-----------|-----------|-----------|------|------|-------|---------|------|-----------------------|
| 14    | 987.6119  | 986.6046  | 986.6025  | 2.13 | 1    | 16    | 63      | 1    | R.RVPFSLLR.S          |
| 25    | 1075.5895 | 1074.5822 | 1074.5669 | 14.2 | 0    | 82    | 2.1e-05 | 1    | R.QLSSGVSEIR.Q        |
| 30    | 1104.5233 | 1103.5160 | 1103.4996 | 14.9 | 0    | 54    | 0.014   | 1    | R.QDEHGYISR.C         |
| 38    | 1149.6195 | 1148.6122 | 1148.5979 | 12.5 | 0    | 86    | 7.8e-06 | 1    | R.LFDQAFGVPR.F        |
| 51    | 1358.6802 | 1357.6729 | 1357.6474 | 18.8 | 0    | 81    | 2.8e-05 | 1    | R.AQIGGPESEQSGAK.-    |
| 57    | 1482.7737 | 1481.7664 | 1481.7474 | 12.8 | 1    | 49    | 0.04    | 1    | K.EGVVEITGKHEER.Q     |
| 67    | 1797.9697 | 1796.9624 | 1796.9309 | 17.6 | 0    | 119   | 5.7e-09 | 1    | R.VSLDVNHFAPEELTVK.T  |
| 73    | 1833.0039 | 1831.9966 | 1831.9680 | 15.6 | 0    | 160   | 3.7e-13 | 1    | K.AVTQSAEITIPVTFEAR.A |

### HSP #2

[gi|149063018](#) Mass: 22794 Score: 222 Queries matched: 3

heat shock 27kDa protein 1 [Rattus norvegicus]

| Query | Observed  | Mr(expt)  | Mr(calc)  | ppm  | Miss | Score | Expect  | Rank | Peptide               |
|-------|-----------|-----------|-----------|------|------|-------|---------|------|-----------------------|
| 12    | 1149.6101 | 1148.6028 | 1148.5979 | 4.33 | 0    | 61    | 0.0028  | 1    | R.LFDQAFGVPR.L        |
| 15    | 1797.9692 | 1796.9619 | 1796.9309 | 17.3 | 0    | 65    | 0.0012  | 1    | R.VSLDVNHFAPEELTVK.T  |
| 17    | 1832.9781 | 1831.9708 | 1831.9680 | 1.56 | 0    | 98    | 7.1e-07 | 1    | K.AVTQSAEITIPVTFEAR.A |

### CRMP2 #3

[gi|157786744](#) Mass: 62273 Score: 499 Queries matched: 10

dihydropyrimidinase-like 2 [Rattus norvegicus]

| Query | Observed  | Mr(expt)  | Mr(calc)  | ppm    | Miss | Score   | Expect  | Rank | Peptide                                   |
|-------|-----------|-----------|-----------|--------|------|---------|---------|------|-------------------------------------------|
| 1     | 908.5043  | 907.4970  | 907.4916  | 6.000  | 34   | 1.1     | 1.1     | 1    | K.VFNLYPR.K                               |
| 5     | 1015.5644 | 1014.5571 | 1014.5458 | 11.20  | 39   | 0.36    | 0.36    | 1    | K.SAAEVIAQAR.K                            |
| 22    | 1294.7053 | 1293.6980 | 1293.6864 | 9.020  | 17   | 59      | 59      | 2    | R.MVIPGGIDVHTR.F                          |
| 26    | 1323.7328 | 1322.7255 | 1322.7558 | 22.890 | 30   | 3.4     | 3.4     | 1    | K.QIGENLIVPGGVK.T                         |
| 31    | 1620.8092 | 1619.8019 | 1619.7865 | 9.500  | 86   | 9.8e-06 | 9.8e-06 | 1    | R.GLYDGPVCEVSVTPK.T + Carbamidomethyl (C) |
| 34    | 1682.8883 | 1681.8810 | 1681.8635 | 10.40  | 72   | 0.00023 | 0.00023 | 1    | K.IVLEDGTLHVTEGSGR.Y                      |

|    |           |           |           |       |    |         |   |                                            |
|----|-----------|-----------|-----------|-------|----|---------|---|--------------------------------------------|
| 39 | 1793.8214 | 1792.8141 | 1792.8115 | 1.450 | 71 | 0.00032 | 1 | K.DNFTLIPEGTNGTEER.M + Deamidated (NQ)     |
| 41 | 1822.9554 | 1821.9481 | 1821.9295 | 10.20 | 41 | 0.34    | 1 | R.SITIANQTNCPYVTK.V + Carbamidomethyl (C)  |
| 44 | 1915.9980 | 1914.9907 | 1914.9575 | 17.40 | 49 | 0.056   | 1 | R.ISVGSADLVIWDPDSVK.T                      |
| 46 | 2149.0493 | 2148.0420 | 2148.0335 | 3.981 | 63 | 0.002   | 1 | K.AVGKDNFTLIPEGTNGTEER.M + Deamidated (NQ) |

#### Serum Albumin #4

[gi|124028612](#) Mass: 68686 Score: 185 Queries matched: 4

##### Serum albumin precursor [Rattus norvegicus]

| Query | Observed  | Mr(expt)  | Mr(calc)  | ppm  | Miss | Score | Expect | Rank | Peptide                |
|-------|-----------|-----------|-----------|------|------|-------|--------|------|------------------------|
| 14    | 1266.6349 | 1265.6276 | 1265.6292 | 1.23 | 0    | 58    | 0.0049 | 1    | R.FPNAEFAEITK.L        |
| 20    | 1439.7874 | 1438.7801 | 1438.7780 | 1.49 | 0    | 45    | 0.11   | 1    | K.APOVSTPTLVEAAR.N     |
| 24    | 1465.7865 | 1464.7792 | 1464.7725 | 4.59 | 0    | 44    | 0.16   | 1    | K.LGEYGFQNAVLVR.Y      |
| 36    | 1960.0610 | 1959.0537 | 1959.0425 | 5.72 | 1    | 40    | 0.39   | 1    | R.YTQKAPQVSTPTLVEAAR.N |

#### Serum Albumin #5

[gi|124028612](#) Mass: 68686 Score: 878 Queries matched: 11

##### Serum albumin precursor [Rattus norvegicus]

| Query | Observed  | Mr(expt)  | Mr(calc)  | ppm   | Miss | Score | Expect  | Rank | Peptide                                    |
|-------|-----------|-----------|-----------|-------|------|-------|---------|------|--------------------------------------------|
| 16    | 1075.4691 | 1074.4618 | 1074.4804 | 17.30 | 0    | 28    | 4.3     | 1    | K.CPYEEHIK.L + Carbamidomethyl C           |
| 22    | 1134.4912 | 1133.4839 | 1133.4958 | 10.44 | 0    | 29    | 3.5     | 1    | K.CCTLPEAQR.L + 2 Carbamidomethyl C        |
| 24    | 1149.5880 | 1148.5807 | 1148.6077 | 23.52 | 0    | 78    | 5.2e-05 | 1    | K.LVQEVTFDAK.T                             |
| 33    | 1248.6077 | 1247.6004 | 1247.6299 | 23.60 | 1    | 59    | 0.0046  | 1    | R.FKDLGEQHF.K.G                            |
| 35    | 1266.6090 | 1265.6017 | 1265.6292 | 21.69 | 0    | 90    | 3.2e-06 | 1    | R.FPNAEFAEITK.L                            |
| 44    | 1439.7590 | 1438.7517 | 1438.7780 | 18.25 | 0    | 135   | 1.1e-10 | 1    | K.APOVSTPTLVEAAR.N                         |
| 47    | 1455.7710 | 1454.7637 | 1454.7994 | 24.51 | 1    | 58    | 0.006   | 1    | R.RHPDYSVSLLLR.L                           |
| 50    | 1465.7448 | 1464.7375 | 1464.7725 | 23.88 | 0    | 122   | 2e-09   | 1    | K.LGEYGFQNAVLVR.Y                          |
| 54    | 1609.7461 | 1608.7388 | 1608.7824 | 27.09 | 0    | 107   | 8e-08   | 1    | K.DVFLGTFLYEYSR.R                          |
| 64    | 1882.8923 | 1881.8850 | 1881.9295 | 23.63 | 0    | 85    | 1.4e-05 | 1    | R.RPCFSALTVDETYVPK.E + Carbamidomethyl C   |
| 68    | 1948.8788 | 1947.8715 | 1947.9109 | 20.19 | 1    | 90    | 4.5e-06 | 1    | K.AADKDNCFATEGPNLVAR.S + Carbamidomethyl C |

#### Serum Albumin #6

[gi|124028612](#) Mass: 68686 Score: 547 Queries matched: 10

##### Serum albumin precursor [Rattus norvegicus]

| Query | Observed  | Mr(expt)  | Mr(calc)  | ppm   | Miss | Score | Expect  | Rank | Peptide                                 |
|-------|-----------|-----------|-----------|-------|------|-------|---------|------|-----------------------------------------|
| 21    | 1299.6725 | 1298.6652 | 1298.6983 | 25.45 | 0    | 22    | 23      | 1    | R.HPDYSVSLLLR.L                         |
| 28    | 1439.7544 | 1438.7471 | 1438.7780 | 21.45 | 0    | 49    | 0.04    | 1    | K.APQVSTPTLVEAAR.N                      |
| 31    | 1455.7753 | 1454.7680 | 1454.7994 | 21.55 | 1    | 67    | 0.00064 | 1    | R.RHPDYSVSLLLR.L                        |
| 33    | 1465.7471 | 1464.7398 | 1464.7725 | 22.31 | 0    | 73    | 0.0002  | 1    | K.LGEYGFQNAVLVR.Y                       |
| 44    | 1609.7517 | 1608.7444 | 1608.7824 | 23.61 | 0    | 100   | 3.9e-07 | 1    | K.DVFLGTFLYEYSR.R                       |
| 47    | 1662.7997 | 1661.7924 | 1661.8447 | 31.44 | 0    | 59    | 0.0046  | 1    | R.LPCVEDYLSAILNR.L +Carbamidomethyl C   |
| 53    | 1768.8278 | 1767.8205 | 1767.8614 | 23.11 | 1    | 16    | 1.1e+02 | 2    | R.MSQRFPNAEFAEITK.L                     |
| 56    | 1882.8949 | 1881.8876 | 1881.9295 | 22.25 | 0    | 60    | 0.0045  | 1    | R.RPCFSALTVDETYVPK.E +Carbamidomethyl C |
| 60    | 1959.9961 | 1958.9888 | 1959.0425 | 27.41 | 1    | 74    | 0.00017 | 1    | R.YTQKAPQVSTPTLVEAAR.N                  |
| 63    | 2059.9758 | 2058.9685 | 2059.0203 | 25.14 | 1    | 31    | 3.3     | 1    | R.RHPYFYAPELLYYAEK.Y                    |

### Serum Albumin #7

[gi|124028612](#) Mass: 68686 Score: 332 Queries matched: 6

#### Serum albumin precursor [Rattus norvegicus]

| Query | Observed  | Mr(expt)  | Mr(calc)  | ppm   | Miss | Score | Expect  | Rank | Peptide                          |
|-------|-----------|-----------|-----------|-------|------|-------|---------|------|----------------------------------|
| 7     | 1017.5113 | 1016.5040 | 1016.5291 | 24.67 | 0    | 37    | 0.79    | 1    | K.SIHTLFGDK.L                    |
| 15    | 1075.4612 | 1074.4539 | 1074.4804 | 24.65 | 0    | 42    | 0.18    | 1    | K.CPYEEHIK.L + Carbamidomethyl C |
| 20    | 1149.5874 | 1148.5801 | 1148.6077 | 24.04 | 0    | 78    | 5e-05   | 1    | K.LVQEVTDFAK.T                   |
| 29    | 1177.5747 | 1176.5674 | 1176.5999 | 27.63 | 1    | 70    | 0.00036 | 1    | R.EAHKSEIAHR.F                   |
| 40    | 1248.6028 | 1247.5955 | 1247.6299 | 27.53 | 1    | 42    | 0.22    | 1    | R.FKDLGEOHFK.G                   |
| 69    | 2059.9719 | 2058.9646 | 2059.0203 | 27.04 | 1    | 64    | 0.0018  | 1    | R.RHPYFYAPELLYYAEK.Y             |

### Serum Albumin #16

[gi|124028612](#) Mass: 68686 Score: 523 Queries matched: 8

#### Serum albumin precursor [Rattus norvegicus]

| Query | Observed  | Mr(expt)  | Mr(calc)  | ppm   | Miss | Score | Expect  | Rank | Peptide                                    |
|-------|-----------|-----------|-----------|-------|------|-------|---------|------|--------------------------------------------|
| 22    | 1149.5984 | 1148.5911 | 1148.6077 | 14.47 | 0    | 17    | 65      | 2    | K.LVQEVTDFAK.T                             |
| 33    | 1299.6838 | 1298.6765 | 1298.6983 | 16.75 | 0    | 24    | 14      | 1    | R.HPDYSVSLLLR.L                            |
| 41    | 1439.7607 | 1438.7534 | 1438.7780 | 17.07 | 0    | 53    | 0.019   | 1    | K.APQVSTPTLVEAAR.N                         |
| 44    | 1455.7813 | 1454.7740 | 1454.7994 | 17.43 | 1    | 64    | 0.0013  | 1    | R.RHPDYSVSLLLR.L                           |
| 47    | 1465.7472 | 1464.7399 | 1464.7725 | 22.24 | 0    | 84    | 1.5e-05 | 1    | K.LGEYGFQNAVLVR.Y                          |
| 55    | 1609.7550 | 1608.7477 | 1608.7824 | 21.56 | 0    | 97    | 8e-07   | 1    | K.DVFLGTFLYEYSR.R                          |
| 63    | 1882.8944 | 1881.8871 | 1881.9295 | 22.51 | 0    | 69    | 0.0005  | 1    | R.RPCFSALTVDETYVPK.E + Carbamidomethyl (C) |
| 68    | 1960.0078 | 1959.0005 | 1959.0425 | 21.44 | 1    | 118   | 5.8e-09 | 1    | R.YTQKAPQVSTPTLVEAAR.N                     |

### Serum Albumin #17

[gi|30794280](#) Mass: 69278 Score: 110 Queries matched: 4

#### Albumin [Bos taurus]

| Query | Observed  | Mr(expt)  | Mr(calc)  | ppm  | Miss | Score | Expect | Rank | Peptide           |
|-------|-----------|-----------|-----------|------|------|-------|--------|------|-------------------|
| 5     | 927.4915  | 926.4842  | 926.4861  | 2.06 | 0    | 17    | 45     | 2    | K.YLYEIAR.R       |
| 10    | 1163.6276 | 1162.6203 | 1162.6234 | 2.62 | 0    | 17    | 74     | 1    | K.LVNELTEFAK.T    |
| 12    | 1479.8082 | 1478.8009 | 1478.7881 | 8.64 | 0    | 46    | 0.09   | 1    | K.LGEYGFQNALIVR.Y |

18 1639.9380 1638.9307 1638.9305 0.15 1 31 2.6 1 R.KVPQVSTPTLVEVSR.S

Also consistent with Serum albumin precursor protein ([gi|1351907](#)).

### $\alpha$ -2-HS-glycoprotein #8

[gi|6978477](#) Mass: 37979 Score: 115 Queries matched: 1

alpha-2-HS-glycoprotein [Rattus norvegicus]

| Query | Observed  | Mr(expt)  | Mr(calc)  | ppm   | Miss | Score | Expect  | Rank | Peptide                                        |
|-------|-----------|-----------|-----------|-------|------|-------|---------|------|------------------------------------------------|
| 54    | 1846.8783 | 1845.8710 | 1845.9156 | 24.14 | 0    | 115   | 1.4e-08 | 1    | K.VGQPGDAGAAGPVAPLCPGR.V + Carbamidomethyl (C) |

### Apolipoprotein E #9

[gi|37805241](#) Mass: 35741 Score: 729 Queries matched: 10

Apolipoprotein E [Rattus norvegicus]

| Query | Observed  | Mr(expt)  | Mr(calc)  | ppm   | Miss | Score | Expect  | Rank | Peptide             |
|-------|-----------|-----------|-----------|-------|------|-------|---------|------|---------------------|
| 1     | 899.4150  | 898.4077  | 898.4337  | 28.95 | 0    | 40    | 0.17    | 1    | R.FWDYLR.W          |
| 8     | 968.5255  | 967.5182  | 967.5451  | 27.75 | 0    | 85    | 7.5e-06 | 1    | R.LGPLVEQGR.Q       |
| 13    | 1019.4564 | 1018.4491 | 1018.4753 | 25.73 | 0    | 43    | 0.15    | 1    | R.LGADMEDLR.N       |
| 24    | 1075.5571 | 1074.5498 | 1074.5822 | 30.10 | 0    | 76    | 9.4e-05 | 1    | R.LQAEIFQAR.I       |
| 38    | 1228.6041 | 1227.5968 | 1227.6320 | 28.63 | 1    | 68    | 0.0005  | 1    | R.GRLEEVEGNQAR.D    |
| 40    | 1239.6470 | 1238.6397 | 1238.6731 | 26.95 | 0    | 110   | 3.3e-08 | 1    | R.TANLGAGAAQPLR.D   |
| 44    | 1289.5870 | 1288.5797 | 1288.6194 | 30.75 | 1    | 25    | 9.8     | 1    | R.LGADMEDLRNR.L     |
| 59    | 1510.7625 | 1509.7552 | 1509.8012 | 30.43 | 1    | 81    | 3.2e-05 | 1    | R.TANLGAGAAQPLRDR.A |
| 62    | 1599.7375 | 1598.7302 | 1598.7787 | 30.35 | 0    | 111   | 2.9e-08 | 1    | K.ELEEQLGPVAEETR.A  |
| 66    | 1720.7742 | 1719.7669 | 1719.8097 | 24.89 | 0    | 92    | 2.8e-06 | 1    | R.NEVNTMLGQSTEELR.S |

### Serine Protease Inhibitor 1 #10

[gi|32563565](#) Mass: 68180 Score: 104 Queries matched: 2

serine protease inhibitor 1 [Rattus norvegicus]

| Query | Observed  | Mr(expt)  | Mr(calc)  | ppm   | Miss | Score | Expect | Rank | Peptide         |
|-------|-----------|-----------|-----------|-------|------|-------|--------|------|-----------------|
| 22    | 1150.5529 | 1149.5456 | 1149.5778 | 28.02 | 0    | 47    | 0.062  | 1    | K.VFSQQADLSR.I  |
| 38    | 1321.6136 | 1320.6063 | 1320.6561 | 37.70 | 0    | 57    | 0.0065 | 1    | K.IAELFSDLEER.T |

Peptides were consistent with other serpin family members:

- A. Serine protease inhibitor 1 [gil207042](#)
- B. Serpin A3L [gil2507387](#)
- C. Unnamed protein product [gil57231](#)
- D. Ab1-021 [gil33086444](#)

except that A, B, and C were published as smaller than the ~68 kD size observed on size separation.

### Translocase OMM 70A #11

[gi|47058988](#) Mass: 67402 Score: 94 Queries matched: 2

translocase of outer mitochondrial membrane 70 homolog A

**[Rattus norvegicus]**

| Query | Observed  | Mr(expt)  | Mr(calc)  | ppm  | Miss | Score | Expect | Rank | Peptide         |
|-------|-----------|-----------|-----------|------|------|-------|--------|------|-----------------|
| 17    | 1079.5823 | 1078.5750 | 1078.5845 | 8.75 | 0    | 31    | 2.6    | 1    | K.YMAEALLLR.A   |
| 41    | 1328.6102 | 1327.6029 | 1327.6157 | 9.59 | 0    | 64    | 0.0014 | 1    | K.NADLSTFYQNR.A |

**Vimentin #12**[gi|14389299](#) Mass: 53700 Score: 184 Queries matched: 7**vimentin [Rattus norvegicus]**

| Query | Observed  | Mr(expt)  | Mr(calc)  | ppm  | Miss | Score | Expect | Rank | Peptide                            |
|-------|-----------|-----------|-----------|------|------|-------|--------|------|------------------------------------|
| 7     | 1081.5103 | 1080.5030 | 1080.4948 | 7.61 | 1    | 26    | 7      | 2    | K.QESNEYRR.Q                       |
| 11    | 1125.6171 | 1124.6098 | 1124.5978 | 10.7 | 1    | 25    | 8.6    | 1    | R.FANYIDKVR.F                      |
| 16    | 1254.5874 | 1253.5801 | 1253.5598 | 16.2 | 0    | 63    | 0.0016 | 1    | R.LGDLYEEEMR.E                     |
| 23    | 1309.6489 | 1308.6416 | 1308.5986 | 32.9 | 0    | 21    | 24     | 2    | K.NLQEAEEWYK.S                     |
| 30    | 1570.9180 | 1569.9107 | 1569.8878 | 14.6 | 0    | 31    | 2.5    | 1    | R.ISLPLPNFSSLNLR.E                 |
| 33    | 1688.8463 | 1687.8390 | 1687.8199 | 11.3 | 1    | (19)  | 47     | 3    | R.VEVERDNLAEDIMR.L                 |
| 35    | 1704.8341 | 1703.8268 | 1703.8148 | 7.05 | 1    | 21    | 32     | 2    | R.VEVERDNLAEDIMR.L + Oxidation (M) |

 **$\alpha$ -ketoglutarate dehydrogenase #13A (same spot as  $\alpha$ -KDH #13B)**[gi|157819765](#) Mass: 116638 Score: 273 Queries matched: 6**oxoglutarate dehydrogenase-like [Rattus norvegicus]**

| Query | Observed  | Mr(expt)  | Mr(calc)  | ppm   | Miss | Score | Expect  | Rank | Peptide               |
|-------|-----------|-----------|-----------|-------|------|-------|---------|------|-----------------------|
| 2     | 897.4280  | 896.4207  | 896.4392  | 20.62 | 0    | 31    | 1.6     | 2    | R.FEDFLAR.K           |
| 14    | 1011.6084 | 1010.6011 | 1010.6236 | 22.28 | 0    | 40    | 0.16    | 1    | R.LNVLANVIR.K         |
| 24    | 1092.5159 | 1091.5086 | 1091.5247 | 14.76 | 0    | 37    | 0.72    | 1    | R.SSPYPTDVAR.V        |
| 48    | 1492.8064 | 1491.7991 | 1491.8409 | 28.01 | 0    | 42    | 0.23    | 1    | K.LVEDHLAVQSLIR.A     |
| 55    | 1705.8571 | 1704.8498 | 1704.8909 | 24.09 | 0    | 23    | 22      | 2    | R.LEQISPFPPDLIMR.E    |
| 59    | 1806.9137 | 1805.9064 | 1805.9523 | 25.42 | 0    | 102   | 2.9e-07 | 1    | R.LPTTTFIGGSENTLSLR.E |

Present in OGDH-like only: Q2; Q55; Q59. Present in both OGDH &amp; OGDH-like: Q14, Q24; Q48.

 **$\alpha$ -ketoglutarate dehydrogenase #13B (same spot as  $\alpha$ -KDH #13A)**[gi|62945278](#) Mass: 116221 Score: 117 Queries matched: 7**oxoglutarate dehydrogenase (lipoamide) [Rattus norvegicus]**

| Query | Observed  | Mr(expt)  | Mr(calc)  | ppm   | Miss | Score | Expect | Rank | Peptide           |
|-------|-----------|-----------|-----------|-------|------|-------|--------|------|-------------------|
| 1     | 886.5294  | 885.5221  | 885.5436  | 24.26 | 0    | 19    | 31     | 1    | R.QILLPFR.K       |
| 10    | 968.4639  | 967.4566  | 967.4763  | 20.36 | 0    | 28    | 3.2    | 1    | R.FEEFLQR.K       |
| 14    | 1011.6084 | 1010.6011 | 1010.6236 | 22.28 | 0    | 40    | 0.16   | 1    | R.LNVLANVIR.K     |
| 24    | 1092.5159 | 1091.5086 | 1091.5247 | 14.76 | 0    | 37    | 0.72   | 1    | R.SSPYPTDVAR.V    |
| 48    | 1492.8064 | 1491.7991 | 1491.8409 | 28.01 | 0    | 42    | 0.23   | 1    | K.LVEDHLAVQSLIR.A |

52 1665.7374 1664.7301 1664.7617 18.97 0 24 14 1 R.TSFDEMLPGTHFQR.V  
 66 2001.9438 2000.9365 2000.9915 27.50 0 72 0.00028 1 R.NTNAGAPPGTAYQSPLSLSR.S

Present in OGDH only: Q1; Q10; Q52; Q66. Present in both OGDH & OGDH-like: Q14, Q24; Q48.

### $\alpha$ -ketoglutarate dehydrogenase #19 (different spot from $\alpha$ -KDH #1A,B)

[gi|62945278](#) Mass: 116221 Score: 117 Queries matched: 3

oxoglutarate dehydrogenase (lipoamide) [Rattus norvegicus]

| Query | Observed  | Mr(expt)  | Mr(calc)  | ppm   | Miss | Score | Expect | Rank | Peptide                  |
|-------|-----------|-----------|-----------|-------|------|-------|--------|------|--------------------------|
| 62    | 1312.6390 | 1311.6317 | 1311.6571 | 19.37 | 1    | 20    | 35     | 3    | R.STRFEEFLQR.K           |
| 70    | 1665.7367 | 1664.7294 | 1664.7617 | 19.39 | 0    | 41    | 0.31   | 1    | R.TSFDEMLPGTHFQR.V       |
| 72    | 2001.9685 | 2000.9612 | 2000.9915 | 15.15 | 0    | 56    | 0.011  | 1    | R.NTNAGAPPGTAYQSPLSLSR.S |

### Moesin #14

[gi|13540689](#) Mass: 67697 Score: 111 Queries matched: 3

moesin [Rattus norvegicus]

| Query | Observed  | Mr(expt)  | Mr(calc)  | ppm   | Miss | Score | Expect  | Rank | Peptide         |
|-------|-----------|-----------|-----------|-------|------|-------|---------|------|-----------------|
| 4     | 976.5310  | 975.5237  | 975.5389  | 15.60 | 0    | 25    | 12      | 6    | K.QLFDQVVK.T    |
| 9     | 1104.5703 | 1103.5630 | 1103.5764 | 12.09 | 0    | 19    | 42      | 2    | K.IGFPWSEIR.N   |
| 13    | 1182.5837 | 1181.5764 | 1181.5869 | 8.90  | 0    | 67    | 0.00059 | 1    | K.APDFVIFYAPR.L |

Also consistent with proteins Radixin([gi|40804379](#)), ezrin([gi|40804381](#)), cytovillin([gi|340217](#))

MS observed: KQLFDQVVKT KIGFPWSEIRN KAPDFVIFYAPRL  
 Moesin: KQLFDQVVKT KIGFPWSEIRN KAPDFVIFYAPRL  
 Radixin: KQLFDQVVKT KIGFPWSEIRN KAPDFVIFYAPRL  
 Ezrin/Cytovillin: KQLFDQVVKT KIGFPWSEIRN KAPDFVIFYAPRL

### LOH 11q2A #15

[gi|38454250](#) Mass: 91425 Score: 299 Queries matched: 6

loss of heterozygosity, 11, chromosomal region 2, gene A homolog [Rattus norvegicus]

| Query | Observed  | Mr(expt)  | Mr(calc)  | ppm   | Miss | Score | Expect  | Rank | Peptide                               |
|-------|-----------|-----------|-----------|-------|------|-------|---------|------|---------------------------------------|
| 24    | 1155.6625 | 1154.6552 | 1154.6812 | 22.45 | 0    | 52    | 0.017   | 1    | R.YLLPAVLNPR.Y                        |
| 29    | 1183.6149 | 1182.6076 | 1182.6284 | 17.61 | 0    | 57    | 0.0065  | 1    | R.DVELLIYYR.E                         |
| 45    | 1372.6124 | 1371.6051 | 1371.6315 | 19.26 | 0    | 28    | 5       | 1    | K.VCGEFVFLMDR.S + Carbamidomethyl (C) |
| 51    | 1467.6772 | 1466.6699 | 1466.6889 | 12.92 | 0    | 54    | 0.014   | 1    | K.YTQETIEEAVER.V                      |
| 54    | 1589.7897 | 1588.7824 | 1588.8097 | 17.14 | 0    | 75    | 0.00013 | 1    | R.YVQELPLESDGALR.Y                    |
| 62    | 1739.9294 | 1738.9221 | 1738.9577 | 20.48 | 1    | 33    | 1.7     | 1    | K.RLDADLGGTEILTPLR.N                  |

### T-kininogen I #18

[gi|205085](#) Mass: 47674 Score: 195 Queries matched: 3

## LMW T-kininogen I precursor [Rattus norvegicus]

| Query | Observed  | Mr(expt)  | Mr(calc)  | ppm   | Miss | Score | Expect | Rank | Peptide               |
|-------|-----------|-----------|-----------|-------|------|-------|--------|------|-----------------------|
| 5     | 994.5385  | 993.5312  | 993.5508  | 19.73 | 0    | 48    | 0.04   | 1    | K.HTHLFALR.E          |
| 62    | 1802.8336 | 1801.8263 | 1801.8635 | 20.62 | 0    | 101   | 3e-07  | 1    | K.YNAELESQGNQFVLYR.V  |
| 67    | 1930.9301 | 1929.9228 | 1929.9584 | 18.45 | 1    | 46    | 0.12   | 1    | K.KYNAELESQGNQFVLYR.V |

Also consistent with T-kininogen 1 precursor (T-kininogen I, [gi|60392582](#)); kininogen 1 ([gi|80861401](#)); major acute phase alpha-1 ([gi|758263](#)); and rCG36716, isoform CRA\_e ([gi|149019924](#)).

## Notes

### 1. Albumin:

- SA#17 is unlikely to be rat albumin, as comparisons below show:

|                        | 65.....76...160.....168...420.....434.436.....452 |                            |                                                              |
|------------------------|---------------------------------------------------|----------------------------|--------------------------------------------------------------|
| <b>MS observed:</b>    | <b>KLVNELTEFAKT</b>                               | <b>KYLYEIARR</b>           | <b>KLGEYGFQNALIVRYtRKVPQVSTPTLVEVSRS</b>                     |
| Bovine Albumin:        | KLVNELTEFAKT                                      | KYLYEIARR                  | KLGEYGFQNALIVRYtRKVPQVSTPTLVEVSRS                            |
| Rat Albumin:           | KL <b>Q</b> EV <b>T</b> DFAKT                     | <b>H</b> YL <b>H</b> EVARR | KLGEYGFQNALIVRYtRKVPQVSTPTLVEVSRS                            |
| Rat Albumin Precursor: | KL <b>Q</b> EV <b>T</b> DFAKT                     | <b>H</b> YL <b>H</b> EVARR | KLGEYGFQNAVLVRYt <b>Q</b> K <b>A</b> PQVSTPTLVE <b>A</b> ARN |

- All spots except SA#4 had peptides identified as unshared by one or more albumin spots.
- Serum Albumin peptides shared between different spots:

|                   |                                                   |
|-------------------|---------------------------------------------------|
| SA#4,5,6,7,16,17: | K.LGEYGFQNAVLVR.Y                                 |
| SA#4,5,6,16:      | K.APQVSTPTLVEAAR.N                                |
| SA#4,6,16:        | R.YTQKAPQVSTPTLVEAAR.N                            |
| SA#4,5:           | R.FPNAEFAEITK.L                                   |
| SA#5,7,16,17:     | K.LVQEVTDFAK.T (K.LVNELTEFAK.T in Bos taurus #17) |
| SA#5,6,16:        | K.DVFLGTFLYEYSR.R                                 |
| SA#5,6,16:        | R.RHPDYSVSLLLR.L                                  |
| SA#5,7:           | K.CPYEEHIK.L+Carbamidomethyl(C)                   |
| SA#5,7:           | R.FKDLGEQHF.K.G                                   |
| SA#6,7:           | R.RHPYFYAPELLYYAEK.Y                              |
| SA#6,16:          | R.RPCFSALTVDETYVPK.E+Carbamidomethyl(C)           |
| SA#6,16:          | R.HPDYSVSLLLR.L                                   |

- It also must be noted that among the 31 spots analyzed, 4 were associated with human keratin (contamination, see Supplemental Data II below), 1 was associated with bovine albumin, and  $\alpha$ 2-HS-glycoprotein (#8) was identified by only a single peptide, despite repeated attempts.

3. The suitability of this gel analysis approach was borne out in the results; of 25 distinct spots chosen for MALDI-TOF analyses, 19 rat proteins were identified (4 were human keratin contaminations, spot #8 had only 1 identifiable peptide, and 1 remained unidentified; 6 spots were reanalyzed due to insufficient protein). Furthermore, 15 of the 19 protein isoforms identified proved to be regulated both with age × injury (**Table 2**, A•B interactions). And each of the three proteins examined by immunoblot were regulated with age and injury (**Figs. 4, 5**)



## Supplemental Data II. Keratin Data

gi|453155 Mass: 61950 Score: 120 Queries matched: 4

keratin 9 [Homo sapiens]

| Observed  | Mr(expt)  | Mr(calc)  | ppm  | Miss | Score | Expect | Rank | Peptide                       |
|-----------|-----------|-----------|------|------|-------|--------|------|-------------------------------|
| 897.4219  | 896.4146  | 896.4062  | 9.39 | 0    | 16    | 45     | 1    | R.MTLDDFR.I                   |
| 1307.6848 | 1306.6775 | 1306.6703 | 5.51 | 1    | 63    | 0.0019 | 1    | R.IKFEMEQLR.Q                 |
| 1323.6757 | 1322.6684 | 1322.6652 | 2.41 | 1    | (17)  | 74     | 5    | R.IKFEMEQLR.Q + Oxidation (M) |
| 1851.9169 | 1850.9096 | 1850.9196 | 5.39 | 1    | 42    | 0.29   | 1    | K.TLNDRMQEYQLIAK.N            |

gi|119395750 Mass: 65999 Score: 87 Queries matched: 3

keratin 1 [Homo sapiens]

| Observed  | Mr(expt)  | Mr(calc)  | ppm   | Miss | Score | Expect | Rank | Peptide             |
|-----------|-----------|-----------|-------|------|-------|--------|------|---------------------|
| 1065.5045 | 1064.4972 | 1064.5138 | 15.58 | 0    | 30    | 2.8    | 1    | K.AQYEDIAQK.S       |
| 1277.7013 | 1276.6940 | 1276.7027 | 6.77  | 0    | 27    | 7.3    | 1    | K.LALDLEIATYR.T     |
| 1716.8480 | 1715.8407 | 1715.8438 | 1.80  | 0    | 31    | 3.2    | 2    | K.QISNLQQSISDAEQR.G |

gi|40354192 Mass: 58792 Score: 392 Queries matched: 9

keratin 10 [Homo sapiens]

| Observed  | Mr(expt)  | Mr(calc)  | ppm   | Miss | Score | Expect | Rank | Peptide                 |
|-----------|-----------|-----------|-------|------|-------|--------|------|-------------------------|
| 995.5181  | 994.5108  | 994.5123  | 1.53  | 1    | 33    | 1.5    | 2    | K.IKEWYEK.H             |
| 1090.5382 | 1089.5309 | 1089.5237 | 6.65  | 0    | 41    | 0.28   | 1    | K.VTMQNLNDR.L           |
| 1109.5031 | 1108.4958 | 1108.4825 | 12.0  | 0    | 46    | 0.062  | 1    | K.DAEAWFNEK.S           |
| 1165.5895 | 1164.5822 | 1164.5775 | 4.08  | 0    | 51    | 0.026  | 1    | R.LENEIQTYR.S           |
| 1234.6843 | 1233.6770 | 1233.6717 | 4.32  | 1    | 56    | 0.008  | 1    | R.LKYENEVALR.Q          |
| 1300.5818 | 1299.5745 | 1299.5877 | 10.14 | 1    | 43    | 0.17   | 1    | K.NHEEEMKDLR.N          |
| 1357.7280 | 1356.7207 | 1356.7110 | 7.20  | 1    | 47    | 0.069  | 1    | R.QSVEADINGLRR.V        |
| 1434.7761 | 1433.7688 | 1433.7626 | 4.32  | 1    | 49    | 0.041  | 1    | K.IRLENEIQTYR.S         |
| 1707.7869 | 1706.7796 | 1706.7649 | 8.62  | 0    | 26    | 10     | 1    | K.GSLGGGFSSGGFSGGSFSR.G |

gi|547754 Mass: 65825 Score: 288 Queries matched: 5

Keratin, type II cytoskeletal 2 epidermal (Cytokeratin-2e) (K2e) (CK 2e) (keratin-2)

| Observed  | Mr(expt)  | Mr(calc)  | ppm  | Miss | Score | Expect  | Rank | Peptide               |
|-----------|-----------|-----------|------|------|-------|---------|------|-----------------------|
| 1037.5304 | 1036.5231 | 1036.5189 | 4.07 | 0    | 38    | 0.48    | 1    | R.YLDGLTAER.T         |
| 1082.6035 | 1081.5962 | 1081.5920 | 3.88 | 1    | 44    | 0.099   | 1    | K.FASFIDKVR.F         |
| 1193.6245 | 1192.6172 | 1192.6088 | 7.07 | 0    | 77    | 6.7e-05 | 1    | K.YEELQVTVGR.H        |
| 1320.5878 | 1319.5805 | 1319.5756 | 3.73 | 0    | 94    | 1.4e-06 | 1    | R.HGGGGGGFSGGGFSGSR.S |
| 1329.6737 | 1328.6664 | 1328.6320 | 25.9 | 0    | 38    | 0.6     | 1    | K.NVQDAIADAEQR.G      |

Supp. Data III. Fold induction of age- and injury-related protein isoforms.

| COMPARISONS: |       | A. INJURED vs. SHAM |       |           |                      | B1. SHAMS by AGE |          |          | B2. INJUREDS by AGE |          |          |                       | A•B INTER-ACTION |
|--------------|-------|---------------------|-------|-----------|----------------------|------------------|----------|----------|---------------------|----------|----------|-----------------------|------------------|
| Gene         | Spot# | Juvenile            | Adult | Geriatric | P-value              | J. vs A.         | J. vs G. | A. vs G. | J. vs A.            | J. vs G. | A. vs G. | P-value               | P-value          |
| HSP          | 2     | 2.72                | 2.20  | 2.41      | 0.0270               | 0.47             | 0.76     | 0.47     | 0.69                | 1.01     | 1.08     | 0.2300                | 0.0339           |
| SAP          | 6     | 17.33               | 3.62  | 4.72      | 4.2x10 <sup>-6</sup> | 0.63             | 1.04     | 0.64     | 0.56                | 0.71     | 0.76     | 0.3800                | 0.0715           |
| α2-HS-GP     | 8     | 6.50                | 3.43  | 1.14      | 0.0024               | 0.39             | 0.66     | 0.41     | 0.37                | 1.87     | 1.99     | 0.0035                | 0.0011           |
| Apo E        | 9     | 2.80                | 1.70  | 1.83      | 0.0700               | 0.32             | 0.36     | 0.22     | 0.61                | 0.63     | 0.67     | 0.3100                | 0.0297           |
| Moesin       | 14    | 6.12                | 2.54  | 2.04      | 0.0027               | 0.34             | 0.32     | 0.20     | 0.43                | 0.51     | 0.54     | 0.1600                | 0.0155           |
| LOH11CR2A    | 15    | 5.74                | 1.98  | 1.12      | 0.0180               | 0.32             | 0.29     | 0.18     | 0.51                | 0.83     | 0.89     | 0.0970                | 0.0126           |
| BSA          | 17    | 11.64               | 1.21  | 0.42      | 0.0028               | 0.36             | 0.24     | 0.15     | 0.95                | 1.87     | 2.00     | 6.8 x10 <sup>-6</sup> | 0.0005           |
| SAP          | 7     | 4.59                | 1.46  | 3.72      | 0.0035               | 0.26             | 4.33     | 2.68     | 0.58                | 3.75     | 4.00     | 6.7x10 <sup>-9</sup>  | 0.0006           |
| Serpin1      | 10    | 5.99                | 1.71  | 4.13      | 0.0035               | 0.16             | 0.96     | 0.60     | 0.31                | 0.75     | 0.80     | 0.0110                | 0.0014           |
| Vimentin     | 12    | 15.57               | 1.80  | 644.2     | 2.6x10 <sup>-5</sup> | 0.27             | 99.98    | 61.83    | 0.48                | 0.50     | 0.53     | 0.4100                | 0.0594           |
| SAP          | 16    | 4.48                | 4.02  | 24.68     | 0.0003               | 0.37             | 70.80    | 43.79    | 0.30                | 9.25     | 9.87     | 3.4x10 <sup>-15</sup> | 0.0001           |
| HSP          | 1     | 3.23                | 5.56  | 1.36      | 0.0290               | 1.62             | 0.39     | 0.24     | 0.94                | 0.92     | 0.98     | 0.1900                | 0.0383           |
| CRMP2        | 3     | 5.52                | 3.81  | 2.79      | 0.0011               | 0.78             | 0.58     | 0.36     | 0.66                | 0.68     | 0.72     | 0.3600                | 0.0625           |
| SAP          | 4     | 2.91                | 1.60  | 0.84      | 0.3100               | 0.18             | 0.12     | 0.08     | 0.36                | 0.47     | 0.50     | 0.4700                | 0.0293           |
| SAP          | 5     | 3.45                | 3.12  | 1.02      | 0.0620               | 0.24             | 0.11     | 0.07     | 0.24                | 0.36     | 0.39     | 0.5000                | 0.0238           |
| T-kininogen1 | 18    | 0.91                | 2.98  | 0.91      | 0.9800               | 0.71             | 0.06     | 0.04     | 0.77                | 0.22     | 0.24     | 3.2 x10 <sup>-5</sup> | 0.1092           |
| TOM70A       | 11    | 1.93                | 0.77  | 0.40      | 0.2200               | 0.13             | 0.07     | 0.04     | 0.56                | 0.56     | 0.60     | 0.0065                | 0.0173           |
| αKGD         | 13    | 0.24                | 0.81  | 0.30      | 0.0170               | 0.16             | 0.07     | 0.04     | 0.65                | 0.73     | 0.78     | 0.0005                | 0.0020           |
| αKGD         | 19    | 1.57                | 0.77  | 0.58      | 0.7200               | 0.14             | 0.09     | 0.06     | 0.60                | 0.52     | 0.55     | 0.0610                | 0.0238           |

In this supplement to Table 2, each section above (A, B1, B2) compares the relative expression in the first group with the second group listed (*R.E.*<sub>1</sub>/*R.E.*<sub>2</sub>). Two-way analysis of variance showed significant differences in expression with age and injury between the 6 groups compared: juvenile-sham, juvenile injured; adult-sham, adult-injured; geriatric-sham, geriatric-injured. P-values for the two-way ANOVAs are in the columns to the right of each set of comparisons. Protein gene names and spot numbers as in **Table 1**.

## Supplemental Data IV. Apparent Sham Effects Among Differentially Expressed Protein Isoforms.

In this analysis, the mean relative expression across all shams were compared to the mean naïves. Sham effects were inferred when the mean value differed by more than 3•SEM. The mean sham R.E. value across age groups deviated from the naïves by greater than 2 standard errors of the mean in 17 of the 19 spots, and by more than 3•SEM in 8 of the 19 spots (shaded boxes overlap with naïve relative expression value, 100%). SEM was deduced from the coefficient of variation returned by Z3 software across all groups using n = 8 per group.

Only 3 of the spots showed increased levels in shams compared to naïves (#18, 11, 13). All of the latter differed by more than 6•SEM from the naïve relative expression value, implying a virtual lack of expression in untreated animals.

| Gene         | Spot# | Average Shams | Average Injureds | C.V. | Shams ± 2•SEM | Shams ± 3•SEM | Injureds ± 2•SEM | Injureds ± 3•SEM |
|--------------|-------|---------------|------------------|------|---------------|---------------|------------------|------------------|
| HSP          | #2    | 30.7%         | 75.5%            | 51%  | 67%           | 85%           | 111%             |                  |
| SAP          | #6    | 17.5%         | 107%             | 79%  | 73%           | 101%          | 51%              |                  |
| α2-HS-GP     | #8    | 24.5%         | 82.7%            | 79%  | 81%           | 109%          | 139%             |                  |
| Apo E        | #9    | 44.9%         | 94.5%            | 42%  | 75%           | 89%           | 124%             |                  |
| Moesin       | #14   | 26.3%         | 87.5%            | 66%  | 73%           | 97%           | 134%             |                  |
| LOH11q2A     | #15   | 25.2%         | 65.8%            | 68%  | 74%           | 98%           | 114%             |                  |
| BSA          | #17   | 4.8%          | 16.0%            | 127% | 94%           | 139%          | 105%             |                  |
| SAP          | #7    | 0.9%          | 3.1%             | 119% | 85%           | 127%          | 87%              | 129%             |
| SPI2a        | #10   | 13.9%         | 44.7%            | 79%  | 70%           | 98%           | 101%             |                  |
| Vimentin     | #12   | 20.4%         | 108%             | 77%  | 75%           | 102%          | 54%              |                  |
| SAP          | #16   | 10.8%         | 46.0%            | 104% | 85%           | 121%          | 120%             |                  |
| HSP          | #1    | 86.0%         | 209%             | 49%  | 120%          |               | 174%             | 157%             |
| CRMP2        | #3    | 56.7%         | 209%             | 59%  | 98%           | 119%          | 167%             | 147%             |
| SAP          | #4    | 73.1%         | 115%             | 33%  | 97%           | 108%          | 90%              |                  |
| SAP          | #5    | 57.0%         | 122%             | 45%  | 89%           | 104%          | 91%              |                  |
| T-kininogen1 | #18   | 3251%         | 3439%            | 89%  | 3189%         | 3157%         | 3376%            | 3345%            |
| TL70A        | #11   | 390%          | 256%             | 58%  | 349%          | 329%          | 215%             | 194%             |
| αKGD         | #13   | 689%          | 289.7%           | 76%  | 634%          | 607%          | 236%             | 209%             |
| αKGD         | #19   | 95.3%         | 87.3%            | 28%  | 115%          |               | 107%             |                  |

**A. Increasing with Age, and induced by injury**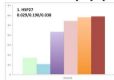**B. Induced by Injury, More so in Juvenile-Inj or Adult-Inj**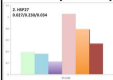**C. Reduced with Age, Induced by injury**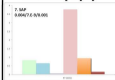**D. Increasing with Age, variably altered by injury**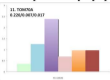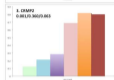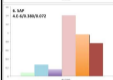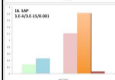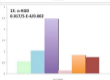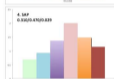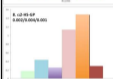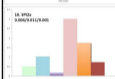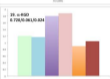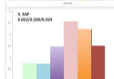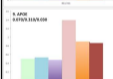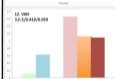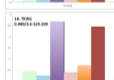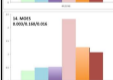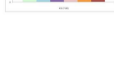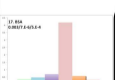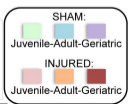

**Supplemental Figure I. Expression trends of 19 spots identified by two-dimensional gel electrophoresis and mass-spectrometry of tryptic peptides as changing with both age and traumatic brain injury**
